# Supplementary material for: Responses of Marine Trophic Levels to the Combined Effects of Ocean Acidification and Warming
Source: Research Square preprint supplement (doi:10.21203/rs.3.rs-3241328/v1), 2023-09-18
Supplement: Supplementary file 1 [file 7494de7b4aa1e3555c6237c4.docx]

**FIGURE S1. Assessment of publication bias.** Funnel plots show lnRR effect size against their inverse standard error for the dataset. The funnel plot was generated from the best model include the Calcifier as the moderator (Table S2) with the optimal random effects structure (Table S1). Symmetrical points around the mean effect (vertical line) indicate no bias. There is little evidence of publication bias.

**
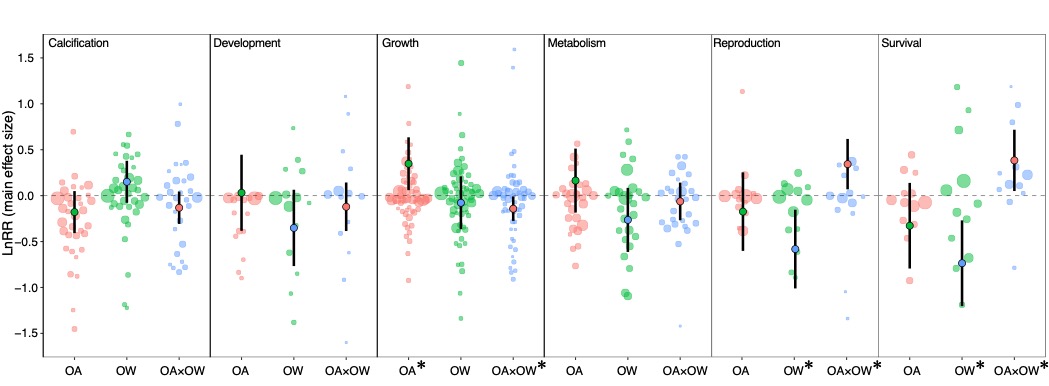
**

**FIGURE 2.** Orchard plots showing mean of main effect size, confidence interval (CIs, bold line) and individual effect size with precision (inverse variance) for ocean acidification (red), ocean warming (green) and their combined effects (blue) on different biological responses. Mean effect size and 95% confidence interval were estimated from multi-level meta-analytic models using the stressor and biological responses as moderators. 95% confidence interval does not overlap with zero indicating significant effect showing by asterisk (*).

**Table S1 Model selection for optimal random effects structure.** Random effect including:Study ID (unique identifier per publication), a species ID (unique identifier per species), an individual effect size ID (in order to quantify residual heterogeneity), the country (unique identifier per country) in which the experiment was performed (if this information was missed in the study, we used the country of the first author), and author group that studies shared the first author. Optimal random effect structure was denoted with bold. Models were fitted with maximum likelihood.

| Random effects | AIC |
| --- | --- |
| Study ID, Effect Size ID (residual) | **846.65** |
| Species, Study ID, Effect Size ID (residual) | 848.66 |
| Country, Study ID, Effect Size ID (residual) | 848.65 |
| Shared first author, Study ID, Effect Size ID (residual) | 848.59 |
| Country, Shared first author, Study ID, Effect Size ID (residual) | 850.56 |
| Species, Shared first author, Study ID, Effect Size ID (residual) | 850.69 |
| Species, Country, Study ID, Effect Size ID (residual) | 850.65 |
| Country, Species, Shared first author, Study ID, Effect Size ID (residual) | 852.57 |

**Table S2 Model selection for evaluating publication bias.** Moderators including:Trophic Level: Factor with 4 levels referring trophic levels; Stressor: Factor with 3 levels: OA, OW and OA×OW; Calcifier: Factor with 2 levels: calcifiers and non-calcifiers. Best models were denoted with bold. Models were fitted with maximum likelihood.

| Moderator | Random effects | AIC |
| --- | --- | --- |
| Stressor | Study ID, Effect Size ID | 850.44 |
| Trophic Level | Study ID, Effect Size ID | 851.27 |
| Calcifier | Study ID, Effect Size ID | **849.51** |
| Calcifier + Trophic Level | Study ID, Effect Size ID | 853.16 |
| Calcifier + Stressor | Study ID, Effect Size ID | 852.23 |
| Stressor + Trophic Level | Study ID, Effect Size ID | 853.99 |
| Stressor + Trophic Level + Calcifier | Study ID, Effect Size ID | 855.88 |

**Table S3. Heterogeneity tests of model fit.** Summary of heterogeneity test (Q statistics) of multi-level meta-analytic models with different moderators. The total heterogeneity (*QT*) can be partitioned into heterogeneity of structural model *QModel* (*QM*) and unexplained heterogeneity *QError* (*QE*). *QM* describes the amount of heterogeneity can be explained by the model structure, and a significant *QE* indicates there is still substantial variation unaccounted for by the model.

|  |  |  |  |  | | Heterogeneity | | | | | |
| --- | --- | --- | --- | --- | --- | --- | --- | --- | --- | --- | --- |
| Dataset | Moderator | | | | *QM* | | | *P (QM)* | *QE* | *P(QE)* |
| Overall | Stressor | | | | 15.39 | | 0.0015 | | 14700.59 | <.0001 |
|  | Stressor × Trophic Level | | | | 22.28 | | 0.0345 | | 15152.85 | <.0001 |
| Calcifier | Stressor | | | | 12.29 | | 0.0065 | | 9960.17 | <.0001 |
|  | Stressor × Trophic Level | | | | 13.47 | | 0.3356 | | 9669.07 | <.0001 |
| Non-calcifier | Stressor | | | | 9.38 | | 0.0246 | | 4719.84 | <.0001 |
|  | Stressor × Trophic Level | | | | 22.76 | | 0.0298 | | 3737.78 | <.0001 |

**Table S4.** **Effects of ocean acidification, ocean warming and their combination on marine trophic levels.** Mean effect size and 95% confidence intervals were estimated from multi-level meta-analytic models included trophic levels and stressors as the moderators using main effect sizes. Percentages in parathesis denotes the proportion of changes. *p* values in bold denotes a significant effect. *k* denotes the number of observations for each trophic level.

| Trophic Level | Stressor | Effect size | Lower CI | Upper CI | *k* | *p* |
| --- | --- | --- | --- | --- | --- | --- |
| Pooled | OA | -0.11 (-10.4%) | -0.185 (-16.9%) | -0.034 (-3.4%) | 162 | **0.0043** |
| Pooled | OW | -0.106 (-10%) | -0.182 (-16.6%) | -0.03 (-2.9%) | 162 | **0.0065** |
| Pooled | OA×OW | -0.053 (-5.1%) | -0.138 (-12.9%) | 0.033 (3.3%) | 162 | 0.2261 |
| Primary Producer | OA | 0.195 (21.5%) | -0.051 (-5%) | 0.441 (55.4%) | 58 | 0.1205 |
| Primary Producer | OW | 0.007 (0.7%) | -0.239 (-21.3%) | 0.254 (28.9%) | 58 | 0.9533 |
| Primary Producer | OA×OW | -0.063 (-6.1%) | -0.256 (-22.6%) | 0.13 (13.8%) | 58 | 0.5202 |
| Herbivore | OA | -0.171 (-15.8%) | -0.282 (-24.6%) | -0.061 (-5.9%) | 75 | **0.0024** |
| Herbivore | OW | -0.106 (-10.1%) | -0.218 (-19.6%) | 0.006 (0.6%) | 75 | 0.0636 |
| Herbivore | OA×OW | -0.041 (-4%) | -0.167 (-15.4%) | 0.085 (8.8%) | 75 | 0.5208 |
| Meso-predator | OA | -0.003 (-0.3%) | -0.341 (-28.9%) | 0.336 (39.9%) | 20 | 0.9875 |
| Meso-predator | OW | -0.013 (-1.3%) | -0.352 (-29.7%) | 0.326 (38.5%) | 20 | 0.9396 |
| Meso-predator | OA×OW | 0.059 (6%) | -0.199 (-18%) | 0.316 (37.2%) | 20 | 0.6549 |
| Top-predator | OA | 0.115 (12.2%) | -0.392 (-32.5%) | 0.622 (86.3%) | 9 | 0.6570 |
| Top-predator | OW | 0.225 (25.2%) | -0.283 (-24.7%) | 0.733 (108%) | 9 | 0.3858 |
| Top-predator | OA×OW | 0.047 (4.8%) | -0.362 (-30.4%) | 0.456 (57.8%) | 9 | 0.8227 |
| Predator | OA | 0.032 (3.3%) | -0.267 (-23.4%) | 0.331 (39.3%) | 29 | 0.8327 |
| Predator | OW | 0.057 (5.8%) | -0.243 (-21.5%) | 0.356 (42.8%) | 29 | 0.7099 |
| Predator | OA×OW | 0.052 (5.3%) | -0.179 (-16.4%) | 0.283 (32.6%) | 29 | 0.6617 |

**Table S5. Effects of ocean acidification, ocean warming and their combination on marine trophic levels of calcifiers.** Mean effect size and 95% confidence intervals were estimated from multi-level meta-analytic models included the trophic level and the stressor as the moderators using main effect sizes. Percentages in parathesis denotes the proportion of changes. *p* values in bold denotes a significant effect. *k* denotes the number of observations for each trophic level.

| Trophic Level | Stressor | | Effect size | Lower CI | Upper CI | *k* | *p* |
| --- | --- | --- | --- | --- | --- | --- | --- |
| Pooled | OA | -0.165 (-15.2%) | | -0.266 (-23.4%) | -0.064 (-6.2%) | 113 | **0.0014** |
| Pooled | OW | -0.073 (-7%) | | -0.175 (-16%) | 0.029 (2.9%) | 113 | 0.1594 |
| Pooled | OA×OW | -0.056 (-5.4%) | | -0.169 (-15.5%) | 0.057 (5.9%) | 113 | 0.3320 |
| Primary Producer | OA | 0.063 (6.5%) | | -0.281 (-24.5%) | 0.407 (50.2%) | 33 | 0.7202 |
| Primary Producer | OW | 0.052 (5.4%) | | -0.293 (-25.4%) | 0.397 (48.7%) | 33 | 0.7665 |
| Primary Producer | OA×OW | -0.038 (-3.7%) | | -0.306 (-26.3%) | 0.23 (25.8%) | 33 | 0.7805 |
| Herbivore | OA | -0.176 (-16.1%) | | -0.314 (-27%) | -0.038 (-3.7%) | 62 | **0.0125** |
| Herbivore | OW | -0.095 (-9.1%) | | -0.235 (-20.9%) | 0.044 (4.5%) | 62 | 0.1793 |
| Herbivore | OA×OW | -0.043 (-4.2%) | | -0.197 (-17.9%) | 0.111 (11.8%) | 62 | 0.5851 |
| Meso-predator | OA | 0.036 (3.7%) | | -0.444 (-35.9%) | 0.516 (67.6%) | 12 | 0.8830 |
| Meso-predator | OW | 0.06 (6.2%) | | -0.421 (-34.3%) | 0.54 (71.6%) | 12 | 0.8073 |
| Meso-predator | OA×OW | -0.025 (-2.5%) | | -0.384 (-31.9%) | 0.334 (39.6%) | 12 | 0.8910 |
| Top-predator | OA | 0.043 (4.4%) | | -0.651 (-47.8%) | 0.736 (108.8%) | 6 | 0.9040 |
| Top-predator | OW | 0.275 (31.6%) | | -0.42 (-34.3%) | 0.969 (163.6%) | 6 | 0.4383 |
| Top-predator | OA×OW | 0.019 (2%) | | -0.531 (-41.2%) | 0.57 (76.9%) | 6 | 0.9451 |
| Predator | OA | 0.04 (4.1%) | | -0.373 (-31.1%) | 0.454 (57.4%) | 18 | 0.8487 |
| Predator | OW | 0.129 (13.8%) | | -0.285 (-24.8%) | 0.543 (72.1%) | 18 | 0.5406 |
| Predator | OA×OW | -0.017 (-1.7%) | | -0.331 (-28.2%) | 0.298 (34.7%) | 18 | 0.9161 |

**Table S6. Effects of ocean acidification, ocean warming and their combination on marine trophic levels of non-calcifiers.** Mean effect size and 95% confidence intervals were estimated from multi-level meta-analytic models included the trophic level and the stressor as the moderators using main effect sizes. Percentages in parathesis denotes the proportion of changes. *p* values in bold denotes a significant effect. *k* denotes the number of observations for each trophic level.

| Trophic Level | Stressor | Effect size | Lower CI | Upper CI | *k* | *p* |
| --- | --- | --- | --- | --- | --- | --- |
| Pooled | OA | 0.028 (2.8%) | -0.082 (-7.8%) | 0.137 (14.7%) | 49 | 0.6181 |
| Pooled | OW | -0.161 (-14.9%) | -0.271 (-23.7%) | -0.051 (-5%) | 49 | **0.0041** |
| Pooled | OA×OW | -0.037 (-3.6%) | -0.163 (-15.1%) | 0.09 (9.4%) | 49 | 0.5716 |
| Primary Producer | OA | 0.365 (44%) | 0.013 (1.3%) | 0.716 (104.7%) | 25 | **0.0419** |
| Primary Producer | OW | 0.003 (0.3%) | -0.349 (-29.4%) | 0.354 (42.5%) | 25 | 0.9879 |
| Primary Producer | OA×OW | -0.098 (-9.3%) | -0.405 (-33.3%) | 0.209 (23.2%) | 25 | 0.5309 |
| Herbivore | OA | -0.144 (-13.4%) | -0.354 (-29.8%) | 0.066 (6.8%) | 13 | 0.1781 |
| Herbivore | OW | -0.151 (-14%) | -0.363 (-30.5%) | 0.062 (6.4%) | 13 | 0.1646 |
| Herbivore | OA×OW | -0.028 (-2.8%) | -0.281 (-24.5%) | 0.225 (25.3%) | 13 | 0.8286 |
| Meso-predator | OA | -0.067 (-6.4%) | -0.51 (-40%) | 0.377 (45.8%) | 8 | 0.7686 |
| Meso-predator | OW | -0.078 (-7.5%) | -0.521 (-40.6%) | 0.366 (44.1%) | 8 | 0.7310 |
| Meso-predator | OA×OW | 0.163 (17.7%) | -0.215 (-19.3%) | 0.54 (71.6%) | 8 | 0.3984 |
| Top-predator | OA | 0.223 (25%) | -0.468 (-37.4%) | 0.914 (149.5%) | 3 | 0.5273 |
| Top-predator | OW | 0.206 (22.8%) | -0.485 (-38.4%) | 0.896 (145%) | 3 | 0.5597 |
| Top-predator | OA×OW | 0.154 (16.7%) | -0.463 (-37.1%) | 0.772 (116.4%) | 3 | 0.6239 |
| Predator | OA | 0.006 (0.6%) | -0.407 (-33.4%) | 0.419 (52%) | 11 | 0.9778 |
| Predator | OW | -0.006 (-0.6%) | -0.419 (-34.2%) | 0.406 (50.1%) | 11 | 0.9755 |
| Predator | OA×OW | 0.157 (17%) | -0.201 (-18.2%) | 0.515 (67.4%) | 11 | 0.3891 |

**Table S7. Relationship between the absolute latitude and main effect sizes.** Results were generated from multi-level meta-regression using absolute latitude as the moderator. Parameters that were significantly different from zero were denoted as bold. SE: standard error.

| Trophic Level | Stressor | *df* | Intercept | *SE* | *p* | | Slope | | *SE* | *p* | |
| --- | --- | --- | --- | --- | --- | --- | --- | --- | --- | --- | --- |
| Primary Producer | OA | 57 | -0.0668 | 0.1613 | | 0.6790 | 0.0011 | 0.0041 | | | 0.7846 | |
| Primary Producer | OW | 57 | -0.6457 | 0.1960 | | **0.0010** | 0.0138 | 0.0050 | | | **0.0059** | |
| Primary Producer | OA×OW | 57 | -0.1393 | 0.2118 | | 0.5106 | 0.0010 | 0.0054 | | | 0.8589 | |
| Herbivore | OA | 74 | -0.3593 | 0.1391 | | **0.0098** | 0.0048 | 0.0033 | | | 0.1421 | |
| Herbivore | OW | 74 | -0.1497 | 0.2139 | | 0.4840 | 0.0009 | 0.0050 | | | 0.8528 | |
| Herbivore | OA×OW | 74 | 0.5153 | 0.4147 | | 0.2139 | -0.0126 | 0.0097 | | | 0.1934 | |
| Meso-predator | OA | 19 | -0.0828 | 0.2338 | | 0.7233 | -0.0007 | 0.0060 | | | 0.9066 | |
| Meso-predator | OW | 19 | -0.1182 | 0.2131 | | 0.5792 | 0.0012 | 0.0055 | | | 0.8232 | |
| Meso-predator | OA×OW | 19 | 0.2223 | 0.2451 | | 0.3643 | -0.0054 | 0.0063 | | | 0.3961 | |
| Top-predator | OA | 8 | 0.6789 | 0.3093 | | **0.0282** | -0.0142 | 0.0066 | | | **0.0313** | |
| Top-predator | OW | 8 | 0.0599 | 2.0360 | | 0.9765 | 0.0025 | 0.0441 | | | 0.9540 | |
| Top-predator | OA×OW | 8 | 0.0911 | 0.5452 | | 0.8673 | -0.0013 | 0.0112 | | | 0.9082 | |
| Predator | OA | 28 | -0.0478 | 0.2070 | | 0.8176 | -0.0007 | 0.0051 | | | 0.8866 | |
| Predator | OW | 28 | -0.1436 | 0.3169 | | 0.6503 | 0.0035 | 0.0078 | | | 0.6555 | |
| Predator | OA×OW | 28 | 0.1959 | 0.1949 | | 0.3149 | -0.0042 | 0.0048 | | | 0.3788 | |

**Table S8. Sensitivity analysis according to Figure 2 and Table S4.** Results were generated from models used the variance-covariance matrices with a correlation of 0.9 among correlated effect size sample variances.See more details in the legend of Table S4.

| Trophic Level | Stressor | Effect size | Lower CI | Upper CI | *k* | *p* |
| --- | --- | --- | --- | --- | --- | --- |
| Pooled | OA | -0.113 (-10.7%) | -0.195 (-17.7%) | -0.031 (-3%) | 162 | **0.0071** |
| Pooled | OW | -0.1 (-9.5%) | -0.183 (-16.7%) | -0.018 (-1.7%) | 162 | **0.0175** |
| Pooled | OA×OW | -0.049 (-4.8%) | -0.142 (-13.3%) | 0.044 (4.5%) | 162 | 0.3036 |
| Primary Producer | OA | 0.203 (22.4%) | -0.058 (-5.7%) | 0.463 (59%) | 58 | 0.1283 |
| Primary Producer | OW | 0.009 (0.9%) | -0.252 (-22.3%) | 0.27 (31%) | 58 | 0.9453 |
| Primary Producer | OA×OW | -0.07 (-6.7%) | -0.28 (-24.4%) | 0.141 (15.1%) | 58 | 0.5160 |
| Herbivore | OA | -0.177 (-16.2%) | -0.298 (-25.7%) | -0.056 (-5.4%) | 75 | **0.0041** |
| Herbivore | OW | -0.099 (-9.5%) | -0.221 (-19.9%) | 0.022 (2.3%) | 75 | 0.1094 |
| Herbivore | OA×OW | -0.032 (-3.1%) | -0.17 (-15.6%) | 0.106 (11.2%) | 75 | 0.6515 |
| Meso-predator | OA | 0.013 (1.3%) | -0.354 (-29.8%) | 0.379 (46.1%) | 20 | 0.9461 |
| Meso-predator | OW | -0.01 (-1%) | -0.376 (-31.3%) | 0.356 (42.8%) | 20 | 0.9582 |
| Meso-predator | OA×OW | 0.051 (5.2%) | -0.232 (-20.7%) | 0.334 (39.7%) | 20 | 0.7237 |
| Top-predator | OA | 0.149 (16.1%) | -0.379 (-31.6%) | 0.678 (96.9%) | 9 | 0.5805 |
| Top-predator | OW | 0.269 (30.9%) | -0.259 (-22.8%) | 0.798 (122%) | 9 | 0.3174 |
| Top-predator | OA×OW | 0.018 (1.8%) | -0.426 (-34.7%) | 0.462 (58.7%) | 9 | 0.9375 |
| Predator | OA | 0.057 (5.8%) | -0.264 (-23.2%) | 0.377 (45.8%) | 29 | 0.7284 |
| Predator | OW | 0.078 (8.1%) | -0.242 (-21.5%) | 0.398 (48.9%) | 29 | 0.6331 |
| Predator | OA×OW | 0.035 (3.6%) | -0.218 (-19.6%) | 0.289 (33.4%) | 29 | 0.7852 |

**Table S9. Sensitivity analysis according to Figure 3a and Table S5 on calcifiers.** Results were generated from models used the variance-covariance matrices with a correlation of 0.9 among correlated effect size sample variances.See more details in the legend of Table S5.

| Trophic Level | Stressor | Effect size | Lower CI | Upper CI | *k* | *p* |
| --- | --- | --- | --- | --- | --- | --- |
| Pooled | OA | -0.113 (-10.7%) | -0.195 (-17.7%) | -0.031 (-3%) | 162 | **0.0071** |
| Pooled | OW | -0.1 (-9.5%) | -0.183 (-16.7%) | -0.018 (-1.7%) | 162 | **0.0175** |
| Pooled | OA×OW | -0.049 (-4.8%) | -0.142 (-13.3%) | 0.044 (4.5%) | 162 | 0.3036 |
| Primary Producer | OA | 0.203 (22.4%) | -0.058 (-5.7%) | 0.463 (59%) | 58 | 0.1283 |
| Primary Producer | OW | 0.009 (0.9%) | -0.252 (-22.3%) | 0.27 (31%) | 58 | 0.9453 |
| Primary Producer | OA×OW | -0.07 (-6.7%) | -0.28 (-24.4%) | 0.141 (15.1%) | 58 | 0.516 |
| Herbivore | OA | -0.177 (-16.2%) | -0.298 (-25.7%) | -0.056 (-5.4%) | 75 | **0.0041** |
| Herbivore | OW | -0.099 (-9.5%) | -0.221 (-19.9%) | 0.022 (2.3%) | 75 | 0.1094 |
| Herbivore | OA×OW | -0.032 (-3.1%) | -0.17 (-15.6%) | 0.106 (11.2%) | 75 | 0.6515 |
| Meso-predator | OA | 0.013 (1.3%) | -0.354 (-29.8%) | 0.379 (46.1%) | 20 | 0.9461 |
| Meso-predator | OW | -0.01 (-1%) | -0.376 (-31.3%) | 0.356 (42.8%) | 20 | 0.9582 |
| Meso-predator | OA×OW | 0.051 (5.2%) | -0.232 (-20.7%) | 0.334 (39.7%) | 20 | 0.7237 |
| Top-predator | OA | 0.149 (16.1%) | -0.379 (-31.6%) | 0.678 (96.9%) | 9 | 0.5805 |
| Top-predator | OW | 0.269 (30.9%) | -0.259 (-22.8%) | 0.798 (122%) | 9 | 0.3174 |
| Top-predator | OA×OW | 0.018 (1.8%) | -0.426 (-34.7%) | 0.462 (58.7%) | 9 | 0.9375 |
| Predator | OA | 0.057 (5.8%) | -0.264 (-23.2%) | 0.377 (45.8%) | 29 | 0.7284 |
| Predator | OW | 0.078 (8.1%) | -0.242 (-21.5%) | 0.398 (48.9%) | 29 | 0.6331 |
| Predator | OA×OW | 0.035 (3.6%) | -0.218 (-19.6%) | 0.289 (33.4%) | 29 | 0.7852 |

**Table S10. Sensitivity analysis according to Figure 3b and Table S6 on non-calcifiers.** Results were generated from models used the variance-covariance matrices with a correlation of 0.9 among correlated effect size sample variances.See more details in the legend of Table S6.

| Trophic Level | Stressor | Effect size | Lower CI | Upper CI | *k* | *p* |
| --- | --- | --- | --- | --- | --- | --- |
| Pooled | OA | 0.028 (2.9%) | -0.084 (-8%) | 0.14 (15.1%) | 49 | 0.6211 |
| Pooled | OW | -0.173 (-15.9%) | -0.286 (-24.8%) | -0.06 (-5.9%) | 49 | **0.0026** |
| Pooled | OA×OW | -0.032 (-3.2%) | -0.164 (-15.1%) | 0.1 (10.5%) | 49 | 0.6333 |
| Primary Producer | OA | 0.389 (47.6%) | 0.027 (2.7%) | 0.752 (112%) | 25 | **0.0354** |
| Primary Producer | OW | 0.025 (2.5%) | -0.336 (-28.5%) | 0.386 (47.1%) | 25 | 0.8921 |
| Primary Producer | OA×OW | -0.131 (-12.3%) | -0.455 (-36.6%) | 0.193 (21.3%) | 25 | 0.4281 |
| Herbivore | OA | -0.143 (-13.3%) | -0.358 (-30.1%) | 0.073 (7.6%) | 13 | 0.1951 |
| Herbivore | OW | -0.153 (-14.2%) | -0.372 (-31%) | 0.066 (6.8%) | 13 | 0.1711 |
| Herbivore | OA×OW | 0.002 (0.2%) | -0.269 (-23.6%) | 0.272 (31.3%) | 13 | 0.9911 |
| Meso-predator | OA | -0.04 (-3.9%) | -0.505 (-39.7%) | 0.425 (53%) | 8 | 0.8658 |
| Meso-predator | OW | -0.049 (-4.8%) | -0.513 (-40.1%) | 0.415 (51.4%) | 8 | 0.8349 |
| Meso-predator | OA×OW | 0.137 (14.7%) | -0.264 (-23.2%) | 0.538 (71.3%) | 8 | 0.5035 |
| Top-predator | OA | 0.209 (23.3%) | -0.478 (-38%) | 0.896 (145%) | 3 | 0.5506 |
| Top-predator | OW | 0.117 (12.4%) | -0.57 (-43.5%) | 0.804 (123.5%) | 3 | 0.7387 |
| Top-predator | OA×OW | 0.208 (23.1%) | -0.442 (-35.7%) | 0.858 (135.9%) | 3 | 0.5305 |
| Predator | OA | 0.034 (3.5%) | -0.394 (-32.6%) | 0.462 (58.8%) | 11 | 0.8753 |
| Predator | OW | 0.003 (0.3%) | -0.423 (-34.5%) | 0.43 (53.8%) | 11 | 0.9876 |
| Predator | OA×OW | 0.139 (14.9%) | -0.24 (-21.4%) | 0.519 (68%) | 11 | 0.4722 |

**Table S11. Sensitivity analysis according to Figure 4 and Table S7.** Results were generated from models used the variance-covariance matrices with a correlation of 0.9 among correlated effect size sample variances.See more details in the legend of Table S7.

| Trophic Level | Stressor | *df* | Intercept | *SE* | *p* | | Slope | | *SE* | *p* | |
| --- | --- | --- | --- | --- | --- | --- | --- | --- | --- | --- | --- |
| Primary Producer | OA | 57 | -0.0654 | 0.1636 | | 0.6891 | 0.0011 | 0.0041 | | | 0.7974 | |
| Primary Producer | OW | 57 | -0.6450 | 0.1989 | | **0.0012** | 0.0138 | 0.0051 | | | **0.0070** | |
| Primary Producer | OA×OW | 57 | -0.1334 | 0.2235 | | 0.5507 | 0.0006 | 0.0057 | | | 0.9216 | |
| Herbivore | OA | 74 | -0.3578 | 0.1438 | | 0.0128 | 0.0048 | 0.0034 | | | 0.1561 | |
| Herbivore | OW | 74 | -0.1497 | 0.2114 | | 0.4789 | 0.0009 | 0.0050 | | | 0.8574 | |
| Herbivore | OA×OW | 74 | 0.4534 | 0.3957 | | 0.2519 | -0.0116 | 0.0092 | | | 0.2096 | |
| Meso-predator | OA | 19 | -0.0769 | 0.2331 | | 0.7415 | -0.0008 | 0.0060 | | | 0.8873 | |
| Meso-predator | OW | 19 | -0.1168 | 0.2116 | | 0.5809 | 0.0013 | 0.0055 | | | 0.8148 | |
| Meso-predator | OA×OW | 19 | 0.2204 | 0.2331 | | 0.3443 | -0.0050 | 0.0060 | | | 0.4020 | |
| Top-predator | OA | 8 | 0.8910 | 0.7561 | | 0.2386 | -0.0196 | 0.0164 | | | 0.2336 | |
| Top-predator | OW | 8 | 0.0567 | 2.0714 | | 0.9782 | 0.0026 | 0.0449 | | | 0.9544 | |
| Top-predator | OA×OW | 8 | -0.0311 | 0.5705 | | 0.9565 | 0.0021 | 0.0123 | | | 0.8617 | |
| Predator | OA | 28 | -0.0335 | 0.2096 | | 0.8729 | -0.0012 | 0.0051 | | | 0.8173 | |
| Predator | OW | 28 | -0.1405 | 0.3270 | | 0.6673 | 0.0033 | 0.0080 | | | 0.6787 | |
| Predator | OA×OW | 28 | 0.1905 | 0.1844 | | 0.3016 | -0.0038 | 0.0045 | | | 0.4078 | |
